# **Rule Activation and Ventromedial Prefrontal Engagement Support Accurate Stopping in Self-Paced Learning**

Sean R. O'Bryan<sup>\*a</sup>, Eric Walden<sup>b</sup>, Michael J. Serra<sup>a</sup>, Tyler Davis<sup>a</sup>

<sup>a</sup> Department of Psychological Sciences, Texas Tech University

<sup>b</sup> Rawls College of Business, Texas Tech University

Correspondence to: [sean.r.obryan@ttu.edu](mailto:sean.r.obryan@ttu.edu)

## **ABSTRACT**

When weighing evidence for a decision, individuals are continually faced with the choice of whether to gather more information or act on what has already been learned. The present experiment employed a self-paced category learning task and fMRI to examine the neural mechanisms underlying stopping of information search and how they contribute to choice accuracy. Participants learned to classify multidimensional stimuli into one of two categories using a rule based on one of the stimulus dimensions. After each trial, participants were given the option to explicitly solve the rule or continue learning. Representational similarity analysis (RSA) was used to examine activation of rule-relevant information on trials leading up to a decision to solve the rule. We found that activation of rule-relevant information increased leading up to participants' stopping decisions. Stopping was associated with widespread activation that included medial prefrontal cortex and visual association areas. Engagement of ventromedial prefrontal cortex (vmPFC) was associated with accurate stopping, and activation in this region was functionally coupled with signal in dorsolateral prefrontal cortex (dlPFC). Results suggest that activating rule information when deciding whether to stop an information search increases choice accuracy, and that dlPFC may act as an executive stopping region in learning contexts by integrating across accumulated evidence in the brain.

**KEYWORDS:** Attention, Category learning, Decision making, fMRI, Representational similarity analysis

## INTRODUCTION

Should I keep studying for my math test? Do I know enough about cars to pick out a good one? When gathering evidence for a decision, individuals are continually faced with the question: Have I learned enough yet? Learners must strike a compromise between collecting enough information to make accurate decisions while avoiding collecting redundant information and—consequently—wasting time and resources.

Currently, little is known about the neurobiological mechanisms that govern decisions about when to stop gathering new information. In the domain of value-based decision making, behavioral research has often focused on heuristics or stopping rules, such as take-the-best, that people employ when presented with cues of varying predictive value (Gigerenzer & Goldstein, 1996). The use of such strategies, however, can vary across participants, even in decision environments that encourage the use of a particular heuristic (Newell & Shanks, 2003; Newell et al., 2004). Thus recent research has begun to focus on participants' use of confidence thresholds for determining when stopping is appropriate, as opposed to application of specific rules per se (Svenson, 1992; Karelaia, 2006; Hausmann & Läge, 2008). In the present study, we test the neural mechanisms that contribute to stopping decisions during learning, and how activation of information associated with a choice evolves leading up to when a decision threshold is reached.

Neurobiologically, in a recent study that required participants to take or decline sequentially-presented stock options, stopping of information search was found to engage anterior cingulate, insula, and ventral striatum (Costa & Averbach, 2015). Additionally, accumulated value and reward associated with stopping decisions in sequential sampling paradigms have been associated with activation in lateral orbitofrontal cortex, vmPFC,

and the basal ganglia (Gluth, Rieskamp, & Büchel, 2012; Costa & Averbeck, 2015).

Although these results have shed light on the neural correlates of stopping in value-based choice, how they translate to stopping in learning contexts, such as when people make decisions about their mastery of new concepts, remains an open question.

Rule-based category learning provides an ideal context to examine the neural basis of stopping in learning because many real world concepts are associated with rules, and because the neural systems that support rule-based categorization are well-understood (for review, see Seger & Miller, 2010; Ashby & Maddox, 2011). Cognitively, rule-based category learning involves using hypothesis testing and selective attention to establish and focus on stimulus dimensions that are relevant for predicting category membership (Maddox & Ing, 2005; Zeithamova & Maddox, 2006). For example, when learning to distinguish between birds and mammals, people may learn to selectively attend to whether an organism has wings. Selective attention emerges over the course of learning to minimize prediction error, and has the effect of expanding the representation of dimensions that lead to successful categorization (Nosofsky, 1986; Kruschke, 1992; Folstein, Palmeri, & Gauthier, 2013). Neurobiologically, rule-based category learning is thought to depend on executive cortico-striatal loops connecting the prefrontal cortex with the head of the caudate (Seger & Miller, 2010). The medial temporal lobes are thought to be involved in the long-term maintenance and retrieval of these category rules (Poldrack et al., 2001; Davis, Love, & Preston, 2012).

Currently, how the neurobiological systems involved in rule-based category learning contribute to decisions to stop learning is not clear because the vast majority of neuroimaging studies have employed fixed numbers of trials and not given participants

leeway in decisions about whether to continue learning. However, it is possible to infer what mechanisms may underlie decisions to stop learning by incorporating predictions from recent neuroimaging research on stopping decisions in value-based choice and research on confidence in choice behavior more generally. In value-based decision making, the vmPFC has been shown to track subjective value (Tom et al., 2007; Bartra et al., 2013), and is sensitive to cost-benefit discrepancies among response options (Basten et al., 2010; Lim, O’Doherty, & Rangel, 2011). These findings are consistent with results showing that the vmPFC tracks accumulated value in value-based stopping decisions. However, recent findings suggest that vmPFC may also code general decision evidence or confidence associated with a choice, perhaps in parallel with value (Barron & Garvert, 2015; Lebreton et al., 2015). Indeed, a number of basic category learning tasks have found that the engagement of vmPFC is correlated with greater decision evidence for categorization choices (Grinbald et al., 2006; DeGutis & D’Esposito, 2007; Seger et al., 2015; Davis, Goldwater, & Giron, 2017). Thus we expect that decision evidence/confidence signals from the vmPFC may contribute to subjective thresholds participants use when deciding whether they have learned enough information.

In addition to the vmPFC, we also expect the dorsolateral PFC (dlPFC) to contribute to stopping decisions. Recent research has suggested that a region of the posterior dlPFC may be involved in comparing accumulated perceptual information to decision criteria when making perceptual decisions (Heekeren et al., 2004; White et al., 2012). In terms of decisions to stop gathering new information, the dlPFC may monitor information from a number of regions to determine when stopping criteria have been reached, including confidence signals from the vmPFC. Indeed, several studies have

observed increased functional connectivity between the dlPFC and vmPFC when participants make decisions that require weighing the subjective values of different choice options (Baumgartner et al., 2011; Rudolf & Hare, 2014). A similar coupling between dlPFC and vmPFC may support computing decision criteria for stopping in category learning.

As a complement to univariate activation, which measures the extent to which brain regions are engaged leading up to decisions to stop, multi-voxel pattern analysis (MVPA) may provide an additional window into how participants are processing category information leading up to stopping decisions. Recent studies have found, as a result of learning, similarities between activation patterns elicited for members of a category come to reflect how participants attend to the stimulus dimensions, such that items sharing values along a rule dimension come to elicit more similar activation patterns (e.g., Mack, Preston, & Love, 2013; Mack, Love, & Preston, 2016). Such changes in neural similarity spaces may track participants' decisions to stop learning. Specifically, we expect that as subjects selectively narrow their attention to a particular rule dimension leading up to a decision to stop gathering information, activation patterns associated with this dimension will become increasingly prominent in the underlying neural similarity space.

To test our predictions for engagement of the vmPFC/dlPFC and how rule-relevant information will be activated leading up to a stopping decision, we trained participants to categorize triads of visual stimuli using simple rules based on one of three binary stimulus dimensions (Figure 1). Participants learned, using trial and error, which stimulus dimension was the rule dimension and was predictive of category membership.

Following each trial, participants were given the option to stop learning and solve the rule. The use of a Type I category structure (Shepard, Hovland, & Jenkins, 1961) allowed participants to solve rules rapidly, allowing us to robustly measure how activation of rule-relevant information evolved over many different individual decisions to stop learning and solve the rule. To further maximize our ability to detect subtle changes in attentional weighting that result from learning, face, object, and scene images were used as stimulus dimensions. These real-world categories exhibit strong properties for representational decoding (Haxby et al., 2001; O'Toole et al., 2005), and were localized within each subject using independent scans to create ROIs that were unbiased to any potential learning effects (Davis et al., 2014). For the purposes of this study, the representational analysis was focused on the activation of patterns associated with the rule dimension that participants eventually chose as the solution during the continue or solve portion of the trial.

To successfully navigate our task, participants must first learn to selectively attend to the rule dimension to predict category membership. We hypothesized that the increasing selective attention to the rule dimension prior to stopping would result in multi-voxel patterns that become increasingly similar to the object class associated with the chosen rule dimension as participants' neared a choice to stop. Once attention is allocated to the potential rule dimension, it is necessary for the participant to monitor the evidence consistent with this category rule. We predicted that vmPFC would be involved in representing the confidence or decision evidence for an attended rule dimension, with stopping marked by greater vmPFC activation than decisions to continue learning. Finally, participants must make a decision to stop learning once this evidence has reached

a criterion. We hypothesized that dlPFC would track confidence/decision evidence signals from the vmPFC to determine whether a stopping threshold had been reached.

To preview our findings, the representational analysis revealed a dynamic neural accumulation process whereby activation of multi-voxel patterns associated with the object class eventually chosen as the rule dimension increased over the trials leading up to stopping decisions. Compared with the choice to continue learning, participants engaged a widespread network of brain regions including medial PFC when choosing to stop; within this contrast, activation of vmPFC and object-selective cortex were positively correlated with participants' ability to solve rules accurately throughout the task. Moreover, we show that decisions to stop acquiring information and solve a rule are associated with enhanced functional connectivity between vmPFC and dlPFC.

## METHODS

### *Participants*

Twenty-five healthy, right-handed volunteers (ages 21 – 57, mean  $\pm$  SEM = 27.32  $\pm$  1.67, 17 women) were recruited through online newsletters and flyers posted at Texas Tech University. All subjects were included in the final analysis. All subjects provided written informed consent prior to participation, and were compensated \$35 for a 1.5 hour session. The study protocol was approved by the Texas Tech University Human Research Protection Program.

### *Experimental Paradigm*

The experimental paradigm consisted of a self-paced category learning task completed over 5 consecutive fMRI scanning runs. Participants first learned to classify image triads as belonging to one of two categories based on feedback delivered following each learning trial. The three simultaneously presented features always consisted of one face, one object, and one scene. One object class was predictive of category membership and was the rule dimension. Subjects were instructed to learn the rule dimension that was predictive of category membership. Each dimension (object class) had two values, resulting in a category structure comprised of six total cues (Figure 1). The face, object, and scene images used were black-and-white squares presented on a white background with black text. The screen positions of each cue (left, right, or center) were randomized on each learning trial to avoid gaze effects. Within each scanning run, the stimuli used for each rule were drawn randomly from a set of 36 images for each respective class, and were removed from the set after they were used for a given rule. After each learning/feedback trial pairing, participants were given the option to explicitly solve the rule (indicating whether faces, objects, or scenes were predictive) or to continue learning. These decision trials were of primary interest to the present study, allowing us to isolate the neural and behavioral correlates of stopping.

Participants received instructions indicating that their goal was to correctly solve as many rules as possible over the course of the experiment. Figure 1 displays a schematic of the self-paced category learning task. Procedurally, image triads were presented on the screen accompanied by the prompt “Category 1 or Category2?” and a response prompt, with a maximum response time of 3 s. Next, feedback was presented



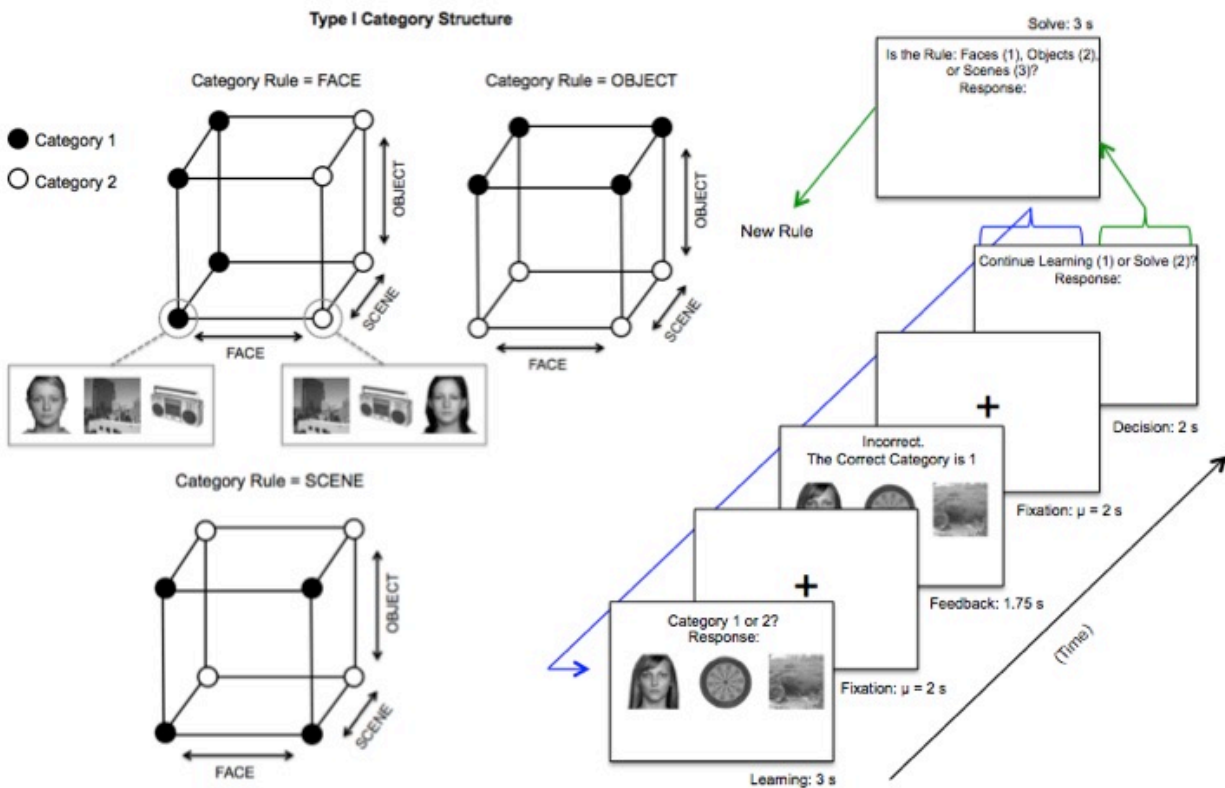

**Figure 1.** Abstract category structure and an example trial for the self-paced rule learning task. Any given rule follows a Type I category structure (Shepard, Hovland, & Jenkins, 1961), where only one stimulus dimension is the “rule dimension” and is predictive of the correct category during learning (e.g., if the category rule is Face: Face 1 = Category 1, Face 2 = Category 2). Each point on the cubes corresponds to one of eight possible exemplars (feature combinations) displayed on the screen. During the task, participants are prompted with the decision to solve the rule or continue learning after each response-feedback pairing. If ‘continue’ is chosen, a new feature combination is randomly selected from the same rule structure and the process repeats. If ‘solve’ is chosen, participants are taken to a screen where they are prompted to select the object class that constituted the rule dimension. Following a solve response, learning begins again with a random rule and new set of stimuli.

for 1.75 s, indicating whether the response was correct or incorrect and the correct response . Feedback included presentation of the associated stimulus triad to facilitate learning. Following feedback, participants were prompted to make a button press indicating whether they wished to continue learning or solve the rule. These decision

trials had a 2 s response deadline, and did not present the associated image triad. If a continue response was given, the task proceeded to the next category learning trial for the current rule and stimulus set. If a solve response was given, participants were prompted to make a response as to whether the rule (predictive feature) was faces, objects, or scenes within 3 s. Regardless of whether a response was given in the allotted time, the rule and associated set of images were then randomly reset, and the task proceeded to a category learning trial for the new rule. Variable fixation periods drawn from truncated exponentials (mean = 2 s) separated stimulus presentation from feedback, feedback from decision trials, decision from solve or the next category learning trial, and solve trials from the next category learning trial. The number of learning trials completed by each participant varied slightly due to the nature of the task and the necessity of a timed cutoff for each scanning run. The mean number of learning trials completed in the sample over 5 functional scans was 150.4 (Range = 140 – 159,  $SD = 4.28$ ). To provide subjects with a performance index of their rule solving accuracy, at the conclusion of each scanning run a screen notified them of the number of rules they correctly solved during that scan. Participants received instructions and completed practice trials for the task outside of the scanner for approximately 10 minutes before engaging in the fMRI experiment.

Prior to beginning the rule learning task, participants completed two functional localizer scans. Each trial of the localizer task involved presenting a face, object, or scene individually on the screen, asking subjects to make a button press corresponding to the appropriate item category within 3 s. Variable fixation lengths drawn from a truncated exponential (mean = 2 s) separated each trial. Over the duration of the localizer phase, subjects categorized 38 examples of each object class. The black-and-white images used

during the localizer runs were presented in a random order, and did not include any of the stimuli used for the experimental task.

### ***Image Acquisition***

Imaging data were acquired on a 3.0 T Siemens Skyra MRI scanner at the Texas Tech Neuroimaging Institute. MPRAGE anatomical scans provided high-resolution structural images of the whole brain in the sagittal plane for each participant (TR = 1.9 s; TE = 2.49 ms;  $\theta = 9^\circ$ ; FoV = 240 x 240 mm; matrix = 256 x 256 mm; slice thickness = 0.9 mm, slices = 192). Functional images were acquired using a single-shot T2\*-weighted gradient echo EPI sequence (TR = 2.09 s; TE = 25 ms;  $\theta = 70^\circ$ ; FoV = 192 x 192 mm; matrix = 64 x 64; number of axial slices = 41, slice thickness = 2.5 mm; 0.5 mm gap), and slices were tilted to reduce orbitofrontal dropout (Deichmann et al., 2003).

### ***Image Analysis and Preprocessing***

Functional data were preprocessed and analyzed using FSL (www.fmrib.ox.ac.uk/fsl) and anatomical preprocessing was conducted with Freesurfer (autorecon1). Time series were skull stripped, motion corrected, prewhitened, and high-pass filtered (cutoff: 60 s). For univariate analysis, data were spatially smoothed using a 6 mm FWHM Gaussian kernel. No spatial smoothing was used for representational similarity analysis. First-level statistical maps were registered to the Montreal Neurological Institute (MNI)-152 template using boundary-based registration (BBR) to align the functional image to the structural image, and 12 df to align the structural image to the MNI-152 template.

Three-level statistical analysis of the functional data was carried out using FEAT and FSL's Randomise. At level-one, within-run associations between task regressors and functional time series were examined. Eight task regressors and their temporal derivatives were included in the level-one analysis, including the onsets of correct/incorrect learning trials, correct/incorrect feedback, decision trials receiving a continue response, decision trials receiving a solve response, and correct/incorrect rule-solving trials. Nuisance regressors included temporal derivatives for the task variables, trials in which subjects failed to make a response, realignment parameters from motion correction, their temporal derivatives, and volume-wise indicator variables for scrubbing volumes that exceeded a framewise displacement of 0.9 mm (Siegel et al., 2014). Task-based regressors were convolved with a double gamma hemodynamic response function, while motion parameters were left unconvolved. Prewhitening was performed at level-one to control for temporal autocorrelation in the hemodynamic response. At level-two, within-run parameter estimates for task variables were averaged across runs for each subject using a fixed effects model. At level-three, we averaged parameter estimates across subjects using a random effects model for population inference. Z-scored mean rule solving accuracy was included in the level-three model as a moderator to test the hypothesis of performance-based differences in neural engagement. Final statistical maps were corrected for multiple comparisons at  $p < .05$  using a permutation-based cluster mass thresholding, implemented in FSL's Randomise. This analysis included a primary (cluster-forming) threshold of  $t = 2.49$  (critical value of  $t$  for  $df = 24$  and  $\alpha = 0.01$ ), and 6 mm variance smoothing. Permutation-based tests are immune to recent concerns

about potential inflation of family-wise error rates in parametric GRF-based cluster thresholding (Eklund, Nichols, & Knutsson, 2016).

### ***Multivariate fMRI Analysis***

To obtain trial-by-trial estimates of the hemodynamic response, we computed a  $\beta$ -map (Rissman, Gazzaley, & D'Esposito, 2004) for each stimulus onset using an LS-A procedure (Mumford et al., 2012). The estimated neural activation patterns for each onset were then registered to standard space. The aim of the multi-voxel pattern analysis was to examine neural signatures indicating the processing of predictive versus non-predictive item classes over time leading up to a solve decision. To obtain featural selective attention predictions, we computed similarities between the patterns for each trial in the experimental procedure and the patterns computed for face-, object-, and scene-only trials from the independent localizer. The  $\beta$ -series used to compute the multi-voxel patterns was spatially localized to a functional ROI spanning category-selective brain regions in ventral temporal/occipital cortex that included lateral occipital complex, fusiform gyrus, and parahippocampal cortex. This mask was created by binarizing and combining the statistical maps for Object > Scene and Scene > Object from the independent localizer task. A Pearson correlation was used to compute correlation distances ( $1 - r$ ) between trials in the category learning task with face, object, and scene patterns from the independent localizer task within each subject. Each subject-level correlation map was transformed using Fisher's  $Z$  and aggregated over trial type for statistical comparison.

The primary goal of the multivariate analysis was to examine how temporal changes in the representation of rule information during learning support stopping

decisions. Therefore, we sorted learning trials according to the rules participants selected during the solve stage, regardless of whether these solve responses were correct. We then counted back five trials from the solution trial to determine how the activation of information associated with the selected class changed as participants approached a solution. Five trials were analyzed in order to capture the average number of learning trials encountered by participants prior to solving (see Behavioral Results). To test whether there were significant time-based changes in neural similarity to the chosen item class during learning, we computed two multi-level models with similarity to chosen/unchosen as the outcome variables and 5-trial n-back to solve as a fixed predictor variable, allowing the intercept for each subject to vary randomly. Similarity output for the chosen/unchosen object class over 3070 total observations served as the level-1 units for each model, nested within 25 participants. A random slope parameter for n-back was then added to each null model to examine whether the relationship between neural similarities and time differed between subjects. We determined whether to proceed with the inclusion of each random effect parameter (i.e., random time slopes and intercepts for each subject) by comparing AIC between model fits.

### ***PPI Analysis***

A psychophysiological interaction analysis was conducted to examine whether any regions of the brain were functionally coupled with vmPFC during stopping decisions. The specific location of the vmPFC ROI (Figure 5A) was obtained by binarizing and anatomically masking the statistical map for Solve > Continue using bilateral frontal medial cortex from the Harvard-Oxford Atlas. FEAT 3-level analysis was

then conducted, starting with the same eight level-1 explanatory variables used in the primary univariate model (see image analysis for further detail). Further, the model included  $z$ -scored time series for the vmPFC seed region, an interaction between Continue (centered) and the vmPFC time series (mean), and an interaction between Solve (centered) and the vmPFC time series (mean). The model included the same nuisance variables as listed above. The contrast of interest for the PPI was the difference between interactions: solve\*vmPFC time series > continue\*vmPFC time series. Final statistical maps were obtained using FSL's Randomise and the same thresholding settings described in the image analysis section.

## RESULTS

### *Behavioral Results*

The average number of learning trials encountered prior to a solve response and subsequent rule switch was 4.48, with mean learning trial accuracy at 57.2% ( $SD = 7.94\%$ , range = 45.9% – 74.5%). Performance curves for category learning trials preceding both correct and incorrect rule solves are displayed in Figure 2. The mean number of solve responses (and thus, rules encountered) by subjects over the 5 task runs was highly variable ( $M = 33.6$ ,  $SD = 10.5$ , range = 11 – 61), which was expected due to the free-responding nature of the task. Group performance for rule solving was well above chance ( $M = 66.1\%$ ,  $SD = 24.5\%$ , range = 19.4% - 94.4%), although 7 participants failed to exceed chance performance.

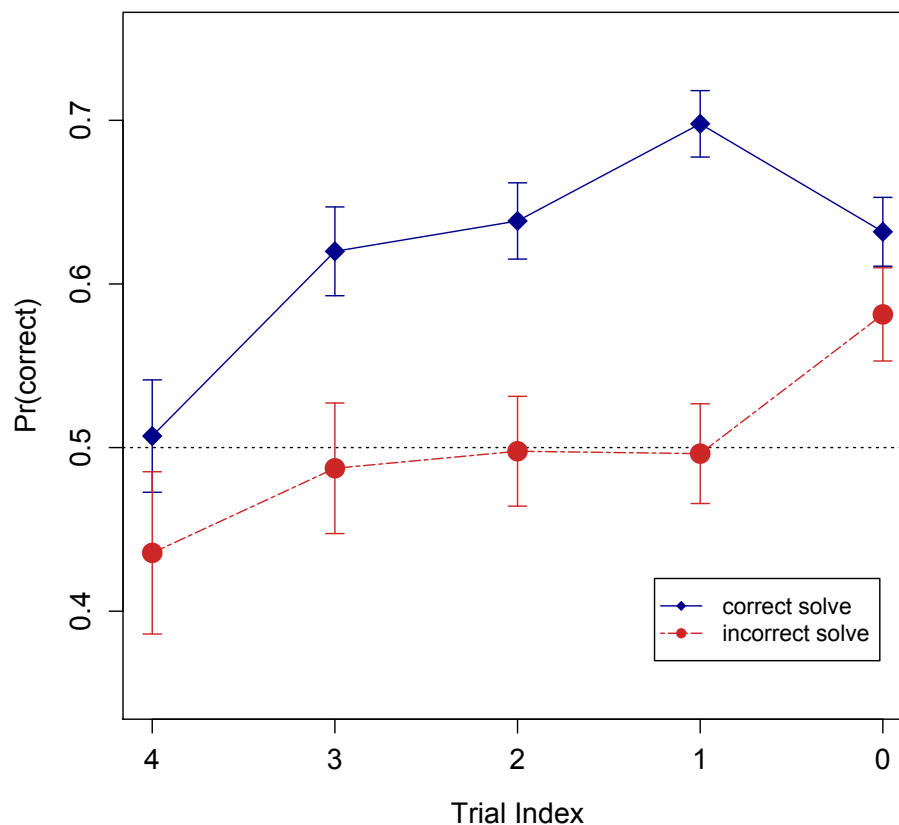

**Figure 2.** Learning performance curves preceding correct and incorrect solves. On the x-axis, 4:0 represent category learning trials preceding a solve decision, with zero being the final learning trial before participants opted to stop and solve the rule. Mean percent correct is depicted on the y-axis. The horizontal line at 50% correct represents chance performance.

### *Time-course of Representational Similarity During Learning*

To solve for a rule, participants need to identify which of the three object classes was predictive of category membership for that rule (i.e., participants needed to solve for the rule dimension). Theories of learned selective attention posit that individuals will shift their attention away from feature dimensions which result in response errors, and through experience learn to focus on only information which is predictive of the outcome



(e.g., Kruschke, 1992). Employing an independent localizer and task stimuli that are characterized by readily distinguishable distributed activation patterns in object-selective cortex (Haxby et al., 2001; O'Toole et al., 2005) enabled us to examine the operation of feature-based selective attention using representational similarity analysis (Kriegeskorte, Mur, & Bandettini, 2008). It was predicted that neural similarity to the subsequently chosen object class would increase over trials leading up to a decision, reflecting an attentional narrowing to dimensions that participants believed to be predictive (regardless of whether or not their belief was correct). Alternatively, we predicted that mean neural similarity to the non-rule/non-predictive dimensions would decrease as a function of time leading up to a decision.

The time course of neural similarities to both the object class participants subsequently chose as the rule dimension (similarity to chosen class) and the classes constituting the unchosen dimensions (similarity to unchosen class) is displayed in Figure 3. As hypothesized, there was a strong increasing relationship between learning duration over the five trials preceding a solve decision and neural similarity to the subsequently chosen item class (Figure 3, blue line), with mean similarity to chosen class increasing as subjects approached a decision ( $\gamma = .019, t = 3.34, p < .001$ ). For similarity to the unchosen class (Figure 3, green line), the n-back to decision variable was also predictive of similarity output ( $\gamma = -.006, t = -2.00, p = .045$ ), with similarity to unchosen items decreasing over the trials preceding decisions to stop learning. In both cases, the addition of a random slope parameter for n-back to decision did not improve model fit according to AIC comparison, suggesting no significant subject-level differences in the relationship between neural similarity to the object classes and trial number. However, adding random

slopes did not affect the main statistical outcome of either model. Considering the two time-courses of neural similarity, it is important to note that the initial advantage of similarity output for the unchosen object classes (Figure 4) is attributable to the fact that early in learning, participants are more likely to be attending to a subsequently unchosen class due to their 2:1 frequency on each trial (see Figure 1).

We next sought to test whether trial-by-trial fluctuations in similarity to chosen class was predictive of stopping, using the binary decision to solve or continue immediately following each learning trial as the dependent variable. Indeed, a multi-level logistic regression revealed a significant positive relationship between similarity to chosen class on learning trials and the choice to solve the rule ( $\gamma = -.319$ ,  $z = -2.99$ ,  $p = .003$ ), allowing each subject to have a random intercept. Including a random slope parameter for similarity to chosen class did not improve model fit based on AIC comparison, and the addition of the random parameter did not affect the statistical significance of this test. Additionally, we found a significant relationship between similarities to unchosen object classes and stopping decisions, with greater neural similarity to these stimulus dimensions predictive of decisions to continue learning ( $\gamma = .585$ ,  $z = 2.84$ ,  $p = .004$ ). Again, adding a random slope parameter did not improve the model fit based on AIC, but its inclusion did not affect the statistical outcome of the test. In sum, our RSA findings for the learning phase are consistent with the hypothesis that learned selective attention to a perceived rule dimension will be reflected by changes in the underlying neural similarity space, and that these attentionally-driven neural dynamics are predictive of stopping decisions in self-paced categorization.

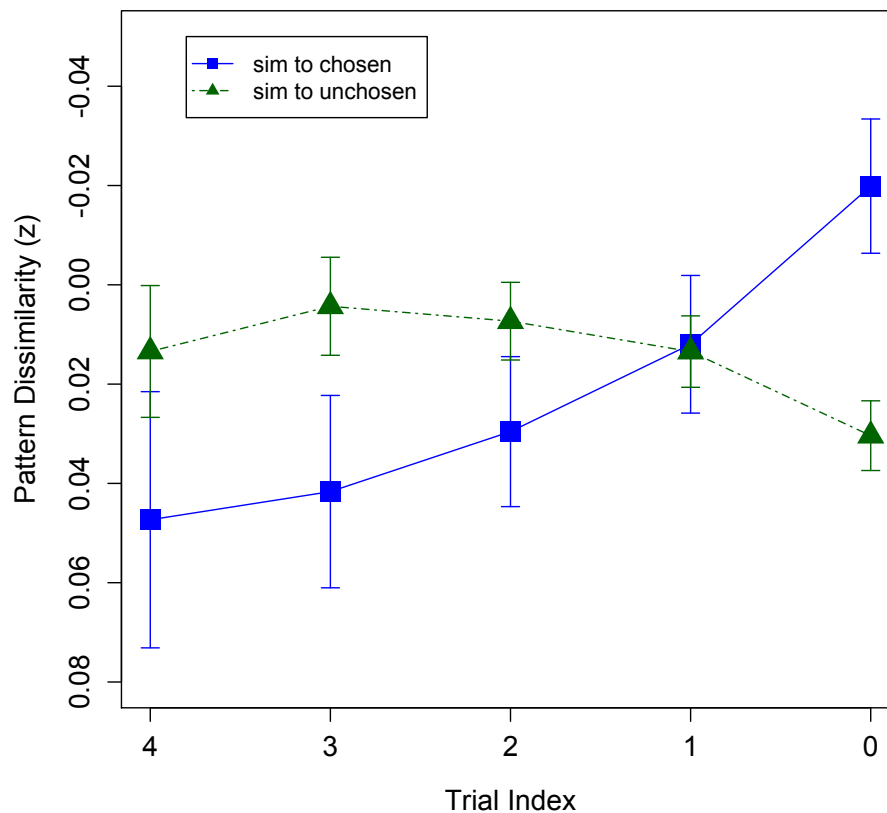

**Figure 3.** Mean time course of neural similarities preceding solve decisions. On the x-axis, 4:0 represent category learning trials preceding a solve decision, with zero being the final learning trial before participants opted to stop and solve the rule. The y-axis displays  $z$ -scored mean multi-voxel pattern dissimilarity in ventral visual cortex. The y-axis is flipped for ease of interpretation, as decreasing values signify increasing neural similarity. “Sim to chosen” (blue) reflects the neural similarity to the feature class that was eventually chosen as the category rule. “Sim to unchosen” (green) reflects the average neural similarity to the two feature classes that were not chosen as the category rule.

### *Neural Correlates of Stopping vs. Continuing on Decision Trials*

It was hypothesized that decisions to stop learning and solve the rules would be more cognitively demanding than choices to continue learning, and would engage a network including prefrontal cortex, basal ganglia, and visual association cortices.

Specifically, we expected that ventral occipitotemporal cortex would be activated because this region is associated with direct sensory or memory-based evidence for an object class (O’Craven & Kanwisher, 2000; Haxby et al., 2001), and that vmPFC would be engaged because of its association with high relative confidence and overall evidence for a decision (Barron & Garvert, 2015; Lebreton et al., 2015; Davis, Goldwater, & Giron, 2017). We contrasted Solve > Continue on decision trials, finding a single, widespread cluster of activation (Figure 4A; Table 1). Within the cluster, the peak BOLD activity was located in medial PFC, spanning bilateral paracingulate gyrus, vmPFC, rostral anterior cingulate, frontal pole, and anterior cingulate cortex. Additional regions exhibiting significant activation for Solve > Continue included (but were not limited to) bilateral ventral occipitotemporal cortex, posterior cingulate, and ventral striatum. No regions were significantly activated for the contrast Continue > Solve. Our findings support the prediction that stopping an information search, compared with decisions to continue learning, engages a broad network including regions that represent visual category information and accumulated decision evidence.

### ***Moderation of Stopping vs. Continuing Activation by Solving Accuracy***

As stopping, in the current task, is an inherently self-governed decision, it was predicted that regional engagement on decision trials would differ between subjects as a function of performance. Specifically, we examined mean rule solving accuracy as a subject-level moderator for the contrast Solve > Continue. It was predicted that individuals who were more accurate in rule solving would exhibit more sensitivity in the vmPFC and regions that discriminate between faces, objects, and scenes. Two clusters

were positively correlated with accuracy on stopping trials (Figure 4B; Table 1). The first cluster was located in right ventral visual cortex, with maxima in lateral occipital complex and occipital fusiform gyrus. The second included bilateral frontal pole, rostral anterior cingulate, and vmPFC. The engagement of our *a priori* ROIs in the moderation suggests that they are involved in *successful* stopping, as their activity during stop decisions is correlated with the likelihood of subjects knowing the correct rule.

Consistent with the prediction that successful stopping decisions would require learned selective attention to predictive object classes, the activation of category selective regions suggests that rule solving accuracy is supported by greater relative consideration of the features associated with a rule when deciding whether to stop. In addition to our attentional predictions, we hypothesized that vmPFC would be associated with task accuracy, as high-performing participants are likely to accumulate more evidence for their decisions and, consequently, be more confident at the time of inference. The observed relationship between vmPFC engagement and task performance confirmed this prediction, and is consistent with recent findings implicating vmPFC in representing high relative decision evidence (Davis, Goldwater, & Giron, 2017) and the confidence associated with value judgments (Barron & Garvert, 2015; Lebreton et al., 2015) in decision making.

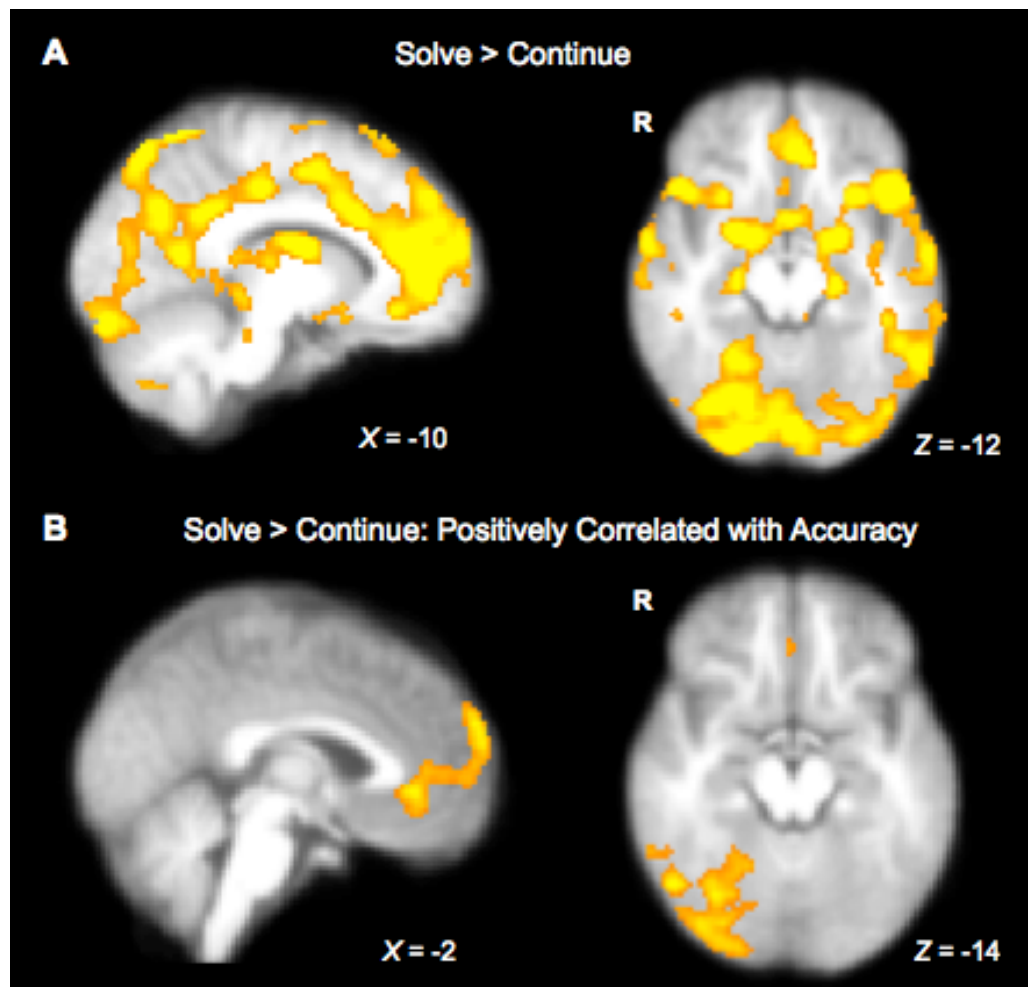

**Figure 4.** Univariate fMRI results. A) Brain regions activated for Solve > Continue on decision trials. B) Regions where activation was positively correlated with mean solve accuracy within the Solve > Continue contrast.

### *PPI Results*

A crucial question concerning the neurobiological basis of stopping an information search is whether there is a specific region responsible for integrating evidence from accumulator regions to precipitate a decision. To address this question, we conducted a PPI analysis to determine where the BOLD signal covaried with activation in vmPFC (Figure 5A) on stopping trials. Based on previous research illustrating its role as an integrator region that responds to inputs from vmPFC (Baumgartner et al., 2011;

Rudorf & Hare, 2014), we predicted that dlPFC would play a critical role in the execution of stopping once a threshold is reached. Consistent with this hypothesis, the PPI analysis revealed activation in bilateral dlPFC that was functionally coupled with the vmPFC seed for Solve > Continue on decision trials (Figure 5B). In addition to dlPFC, signal in dorsomedial PFC and pre-SMA was correlated with activity in the seed region. We believe these results suggest a role of the dlPFC in determining a decision threshold based on accumulated evidence and initiating the transition from learning to choice.

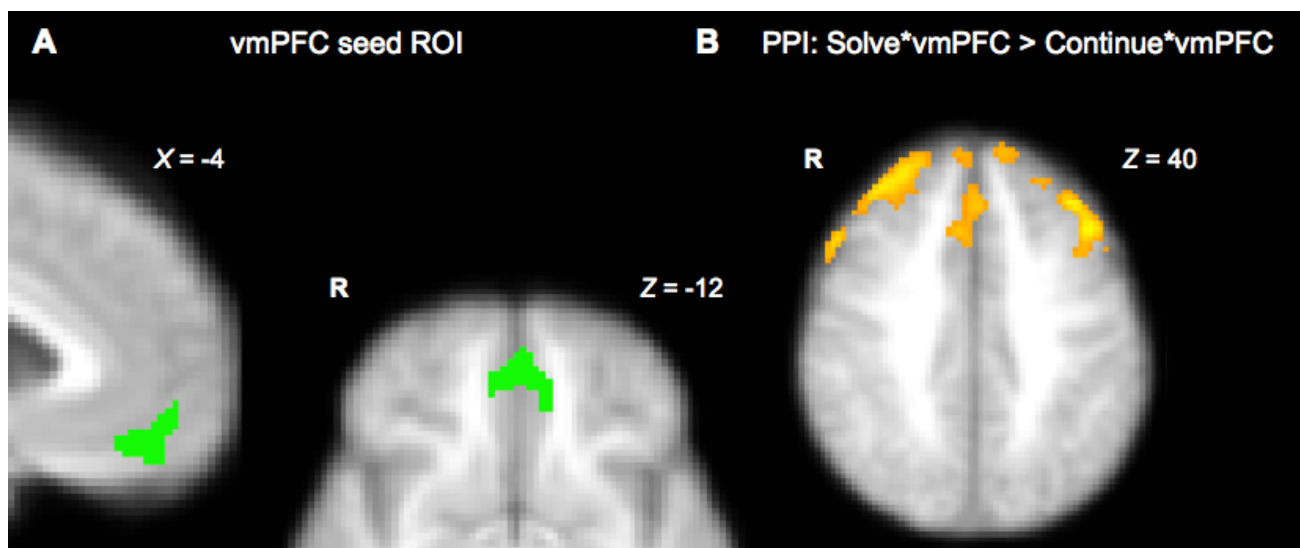

**Figure 5.** Results of the PPI analysis. A) The vmPFC seed region used in the PPI. B) Regions where neural activation covaried with the BOLD time series in vmPFC on decision trials receiving a solve response versus a continue response.

**Table 1.** Activated clusters and peaks (MNI coordinates) for the fMRI results in Figure 4.

| Contrast                                                                    | Cluster Size               | Region                                 | X   | Y   | Z   | Max <i>t</i> -stat |
|-----------------------------------------------------------------------------|----------------------------|----------------------------------------|-----|-----|-----|--------------------|
| <b>Solve &gt; Continue</b>                                                  | Cluster 1<br>Voxels: 65440 | Medial PFC /<br>Paracingulate<br>Gyrus | 0   | 54  | 12  | 10.20              |
|                                                                             |                            | Left Frontal Orbital<br>Cortex         | -26 | 32  | -26 | 10.10              |
|                                                                             |                            | vmPFC /<br>Paracingulate<br>Gyrus      | 0   | 54  | 2   | 9.87               |
|                                                                             |                            | Anterior Cingulate                     | 0   | 36  | 22  | 9.45               |
| <b>Solve &gt; Continue:<br/>Positively<br/>correlated with<br/>accuracy</b> | Cluster 1<br>Voxels: 1219  | Right Lateral<br>Occipital Complex     | 50  | -62 | -18 | 5.86               |
|                                                                             |                            | Right Occipital<br>Fusiform Gyrus      | 34  | -68 | -16 | 4.41               |
|                                                                             |                            | Right Lateral<br>Occipital Complex     | 32  | -88 | -16 | 4.13               |
|                                                                             |                            | Left Frontal Pole                      | -20 | 62  | 22  | 4.88               |
|                                                                             | Cluster 2<br>Voxels: 1248  | Rostral Anterior<br>Cingulate / vmPFC  | -2  | 36  | -2  | 4.25               |



**Table 2.** Activated clusters and peaks (MNI coordinates) for the fMRI results in Figure 5.

| Contrast                                                                            | Cluster Size              | Region                                         | X   | Y  | Z  | Max <i>t</i> -stat |
|-------------------------------------------------------------------------------------|---------------------------|------------------------------------------------|-----|----|----|--------------------|
| <b>PPI:<br/>Solve*vmPFC<br/>time series &gt;<br/>Continue*vmPFC<br/>time series</b> | Cluster 1<br>Voxels: 4151 | Dorsomedial PFC /<br>Superior Frontal<br>Gyrus | 2   | 34 | 58 | 4.75               |
|                                                                                     |                           | Left dlPFC /<br>Middle Frontal<br>Gyrus        | -28 | 24 | 56 | 4.57               |
|                                                                                     |                           | Pre-Supplementary<br>Motor Area                | 0   | 8  | 70 | 4.54               |
|                                                                                     |                           | Left dlPFC /<br>Frontal Pole                   | -18 | 42 | 48 | 4.52               |

## DISCUSSION

In real-world decision environments, learners are responsible for regulating the amount of time they spend gathering information about a concept before making a choice. This regulation process is instantiated by people's decisions to stop learning. To understand the neural mechanisms responsible for stopping of information search in humans, we used fMRI and a self-paced category learning task where participants learned unidimensional rules where a single visual feature was predictive of category membership. Our fMRI results show that compared with continuing to learn, decisions to stop engage a broad network of brain regions including PFC, basal ganglia, and visual

association cortices. Behaviorally, the sample varied in desired learning length (time-to-stop) and rule-solving accuracy. Higher task accuracy was predictive of greater activation in vmPFC, frontal pole, and right occipitotemporal cortex on stopping trials. Using MVPA, we tracked neural similarity to the features (face, object, or scene) during learning that were eventually chosen to be the predictive class. This analysis revealed a significant linear increase of similarity to chosen classes over the five learning trials prior to a solve response, and further, that pattern similarities were predictive of choice on a trial-by-trial basis. Finally, a psychophysiological interaction analysis revealed that the dlPFC was more functionally coupled with the vmPFC when subjects chose to stop versus continue, consistent with its hypothesized role in monitoring accumulated evidence to determine whether a decision threshold has been reached.

In the context of our rule-based, multi-feature category learning task, individuals must learn to distinguish relevant from irrelevant information to accurately classify exemplars. Rather than measuring fluctuations in mean activation within our ventral visual ROI in response to varying task conditions, the use of MVPA allowed us to estimate the extent to which participants were focusing on each object class over the course of the task. Our analysis revealed that selective attention to object classes that subjects eventually chose as the rule dimension when solving a displayed an approximately linear ramping effect over the trials preceding solve decisions. Further, trial-by-trial estimates of representational similarity to chosen classes during learning were predictive of decisions to stop learning and solve the rule immediately following the trial. These findings extend previous research suggesting that neural representations of stimuli are modified over the course of category learning to facilitate optimal

performance within a variety of task structures (Mack, Love, & Preston, 2013; Folstein, Palmeri, & Gauthier, 2013; Davis & Poldrack, 2014) by showing how learning-dependent changes in the neural similarity space relate to subjective decision criteria. To our knowledge, this study is the first to examine the time course of dimensional selective attention in self-paced learning.

The vmPFC is a region that we hypothesized would be more activated for stopping versus the choice to continue learning. Past research has thoroughly established a role of the vmPFC in reward prediction and subjective value assessment (Tom et al., 2007; Bartra et al., 2013). Due to the absence of extrinsic rewards for correct responses or differing outcomes that were mapped on to each feature, in this study it was expected that the vmPFC would serve a more general function of tracking evidence for category rules (Davis, Goldwater, & Giron, 2017). Indeed, we found vmPFC to be one of the regions involved in stopping, and that activation in vmPFC covaried with task accuracy at the time subjects chose to stop. These results lend support to an emerging area of research that has implicated vmPFC in representing subjective confidence in parallel with value (Barron & Garvert, 2015; Lebreton et al., 2015). The most apparent psychological variable separating an individual's choice to solve a rule versus spending more time collecting information is their desired level of confidence (Karelaia et al., 2006; Hausmann & Läge, 2008). When opting to solve, participants are demonstrating that they have reached a sufficient threshold of knowledge about which features are diagnostic – in other words, they know that they know the rule. Decision confidence may provide an inherent value that is inseparable from the well-established findings on reward and the vmPFC. The present results suggest that in learning paradigms that demand varying

attention to different visual features, accumulation processes in vmPFC are closely linked to absolute differences in the strength of competing feature representations. The idea that vmPFC tracks the strength of signal in relevant perceptual regions accords with our finding that greater task accuracy was associated with higher relative activation in both vmPFC and ventral occipitotemporal cortex. From a learned selective attention standpoint, individuals who represent predictive features the most strongly should both be more confident in their decisions and more accurate in their inferences.

Our results extend recent research examining the neural correlates of decision evidence in categorization. Using a temporally extended classification task wherein probabilistic cues were presented to participants incrementally within a trial, Braunlich and Seger (2016) employed a model-based fMRI approach to isolate brain regions associated with parametric modulations in decision evidence that were independent of response- and urgency-related signals over time. Their results revealed that the absolute value of decision evidence accumulated over a trial correlated with activation in rostral and dorsolateral PFC, but surprisingly, was not associated with increased signal in vmPFC. One possibility for the divergence in results between this study and the current experiment regarding vmPFC is that this region is specifically engaged in relation to subjective appraisals of decision evidence, as opposed to reflecting the objective amount of evidence a person is exposed to. The regions engaged for stopping decisions in our study are not inherently tied to the objective evidence for a rule, as reflected in the high degree of variability in the average number of trials participants chose to view before opting to solve the rules. Rather, by their very nature, these stopping decisions are a reflection of participants' subjective estimates of making a correct response. This idea

accords with findings in the memory literature that implicate vmPFC in tracking metacognitive “feeling-of-knowing” judgments associated with retrieval attempts, but not retrieval accuracy itself (Schnyer, Nichols, & Verfaellie, 2005). Taken together, we suggest that while rostral and dorsal subregions of the PFC appear to be critical for performing computations related to finite differences in decision evidence (e.g., Heekeren et al., 2004; Braunlich & Seger, 2016; Davis, Goldwater & Giron, 2017), vmPFC may uniquely represent more subjective decision variables such as confidence and the perceived costs and benefits associated with a decision (e.g., Basten et al., 2010).

Through a psychophysiological interaction analysis, we found that activation in vmPFC during stopping decisions is coupled with modulation of dlPFC. These findings are generally consistent with previous research showing that dlPFC interacts dynamically with vmPFC by comparing value signals represented in the latter region, and that dlPFC may precipitate responses based on this comparison process (Pochon et al., 2002; Baumgartner et al., 2011; Kahnt et al., 2011; Rudorf & Hare, 2014). In light of this evidence, we believe that dlPFC plays an executive role in the regulation of self-paced learning. When subjects chose to stop learning and respond to the rule, activity in vmPFC covaried with dlPFC to a greater extent than when they were not yet ready to solve. Accordingly, dlPFC may compute whether a decision threshold has been reached based on the relative evidence that has accumulated for a given category rule and participants’ meta-knowledge of the task structure. Our results regarding vmPFC-dlPFC interactions in self-paced category learning serve as a bridge between research focused on simple perceptual decisions and studies that primarily focus on the expected reward or monetary gains/losses incurred from a decision, and suggest that a common neural mechanism may

support stopping in both category learning and value-based decision making.

In conclusion, to balance accuracy and efficiency in decision making, learners must determine when their current knowledge state matches the knowledge that is required to achieve a particular goal. Using representational similarity analysis, we illustrate that such stopping decisions are preceded by greater activation of predictive stimulus dimensions, consistent with theories of learned selective attention. Although stopping engaged a widely distributed network in the brain, our findings suggest that vmPFC and object-selective cortical regions are differentially engaged according to participants' tendencies to accurately solve rules, and thus these regions may play unique roles in supporting accurate and timely stopping decisions in self-paced category learning. Finally, our results suggest that dlPFC plays a crucial executive role in stopping by computing a threshold based on decision evidence that is represented in vmPFC.

## **AUTHOR CONTRIBUTIONS**

SO, EW, MS, and TD designed the study and wrote the paper. SO and TD analyzed the fMRI data. SO collected the fMRI data for the experiment.

## **ACKNOWLEDGEMENTS**

Data collection for this project was funded by an internal grant awarded to TD and EW from Texas Tech University.

## REFERENCES

- Ashby, F.G., & Maddox, W.T. (2011). Human category learning 2.0. *Ann N Y Acad Sci*, 1224, 147-161.
- Basten, U., Biele, G., Heekeren, H.R., & Fiebach, C.J. (2010). How the brain integrates costs and benefits during decision making. *Proc Natl Acad Sci USA*, 107, 21767–21772.
- Bartra, O., McGuire, J. T., & Kable, J. W. (2013). The valuation system: a coordinate-based meta-analysis of BOLD fMRI experiments examining neural correlates of subjective value. *NeuroImage*, 76, 412-427.
- Barron, H., & Garvert, M. (2015). Reassessing VMPFC: full of confidence? *Nat Neurosci*, 18, 1064-1066.
- Baumgartner, T., Knoch, D., Hotz, P., Eisengger, C., & Fehr, E. (2011). Dorsolateral and ventromedial prefrontal cortex orchestrate normative choice. *Nat Neurosci*, 14, 1468-1476.
- Braunlich, K. & Seger, C.A. (2016). Categorical evidence, confidence, and urgency during probabilistic categorization. *NeuroImage*, 125, 941–952.
- Costa, V.D., & Averbeck, B.B. (2015). Frontal-parietal and limbic-striatal activity underlies information sampling in the best choice problem. *Cereb Cortex*, 25, 972-982.
- Davis T, Love BC, Preston AR. 2012b. Striatal and hippocampal entropy and recognition signals in category learning: simultaneous processes revealed by model-based fMRI. *J Exp Psychol Learn Mem Cogn*, 38, 821–839.
- Davis, T., & Poldrack, R. A. (2014). Quantifying the internal structure of categories

- p using a neural typicality measure.
- Cereb Cortex*
- , 24, 1720-1737.
- Davis, T., Goldwater, M.B., & Giron, J. (2017). From concrete examples to abstract relations: The rostrolateral prefrontal cortex integrates novel examples into relational categories. *Cereb Cortex*, 27, 2652-2670.
- Deichmann, R., Gottfried, J. A., Hutton, C., & Turner, R. (2003). Optimized EPI for fMRI studies of the orbitofrontal cortex. *NeuroImage*, 19, 430-441.
- DeGutis, J., & D’Esposito, M. (2007). Distinct mechanisms in visual category learning. *Cogn Affect Behave Neurosci*, 7, 251-259.
- Ecklund, A., Nichols, T., & Knutsson, H. (2015). Can parametric statistical methods be trusted for fMRI based group studies? *Proc Natl Acad Sci USA*, 113, 7900-7905.
- Folstein, J. R., Palmeri, T. J., & Gauthier, I. (2013). Category learning increases discriminability of relevant object dimensions in visual cortex. *Cereb Cortex*, 23, 814–823.
- Gigerenzer, G., & Goldstein, D. (1996). Reasoning the fast and frugal way: Models of bounded rationality. *Psychological Review*, 103, 650–669.
- Gluth, S., Rieskamp, J., & Büchel, C. (2012). Deciding when to decide: time-variant sequential sampling models explain the emergence of value-based decisions in the human brain. *J Neurosci*, 32, 10686-10698.
- Grinbald, J., Hirsch, J., & Fererra, V.P. (2006). A neural representation of categorization uncertainty in the human brain. *Neuron*, 49, 757-763.



- Hausmann, D., & Läge, D. (2008). Sequential evidence accumulation in decision making: The individual desired level of confidence can explain the extent of information acquisition. *Judgment and Decision Making*, 3, 229-243.
- Haxby, J.V., Gobbini, M.I., Furey, M.L., Ishai, I., Schouten, J.L., & Pietrini, P. (2001). Distributed and overlapping representations of faces and objects in ventral temporal cortex. *Science*, 293, 2425–2430.
- Heekeren, H.R., Marrett, S., Bandettini, P.A., & Ungerleider, L.G. (2004). A general mechanism for perceptual decision-making in the human brain. *Nature*, 431, 859-862.
- Kahnt, T., Heinzle, J., Park, S.Q., & Haynes, J. (2011). Decoding different roles for vmPFC and dlPFC in multi-attribute decision making. *NeuroImage*, 56, 709-715.
- Karelaia, N. (2006). Thirst for confirmation in multi-attribute choice: Does search for consistency impair decision performance? *Organizational Behavior and Human Decision Processes*, 100, 128-143.
- Kriegeskorte, N., Mur, M., & Bandettini, P. (2008). Representational similarity analysis—connecting the branches of systems neuroscience. *Front Syst Neurosci*, 2, 4.
- Kruschke, J. K. (1992). ALCOVE: An exemplar-based connectionist model of category learning. *Psych Rev*, 99, 22-44.
- Lebreton, M., Abitbol, R., Daunizeau, J., & Pessiglione, M. (2015). Automatic integration of confidence in the brain valuation signal. *Nat Neurosci*, 18, 1159-1170.

- Lim, S., O'Doherty, J.P., & Rangel, A. (2011). The decision value computations in the vmPFC and striatum use a relative value code that is guided by visual attention. *J Neurosci*, *31*, 13214-13223.
- Mack., M.L., Preston, A.R., & Love, B.C. (2013). Decoding the brain's algorithm for categorization from its neural implementation. *Curr Bio*, *23*, 1-5.
- Mack, M.L., Love, B.C., & Preston, A.R. (2016). Dynamic updating of hippocampal representations reflects new conceptual knowledge. *Proc Natl Acad Sci USA*, *113*, 13203-13208.
- Maddox, W.T., & Ing, A.D. (2005). Delayed feedback disrupts the procedural-learning system but not the hypothesis-testing system in perceptual category learning. *J Exp Psychol Learn Mem Cogn*, *31*, 100–107.
- Mumford, J.A., Turner, B.O., Ashby, F.G., & Poldrack, R.A. (2012). Deconvolving BOLD activation in event-related designs for multivoxel pattern classification analyses. *NeuroImage*, *59*, 2636 –2643.
- Newell, B.R., & Shanks, D.R. (2003). Take the best or look at the rest? Factors influencing “one-reason” decision making. *J Exp Psychol Learn Mem Cogn*, *29*, 53-65.
- Newell, B.R., Rakow, T., Weston, N.J., & Shanks, D.R. (2004). Search strategies in decision making: The success of “success”. *Journal of Behavioral Decision Making*, *17*, 117-137.
- Nosofsky, R.M. (1986). Attention, similarity, and the identification- categorization relationship. *J Exp Psychol Gen*, *115*, 39-57.
- O'Craven, K.M., & Kanwisher, N. (2000). Mental imagery of faces and places activates

- p>corresponding stimulus-specific brain regions.
- J Cogn Neurosci*
- , 12, 1013-1023.
- O'Toole, A. J., Jiang, F., Abdi, H., & Haxby, J. V. (2005). Partially distributed representations of objects and faces in ventral temporal cortex. *J Cogn Neurosci*, 17, 580–590.
- Pochon, J.B., Levy, R., Fossati, P., Lehericy, S., Poline, J.B., Pillone, B., Le Behan, D., & DuBois, B. (2002). The neural system that bridges reward and cognition in humans. *Proc Natl Acad Sci USA*, 99, 5669-5674.
- Poldrack, R.A., Clark, J., Pare-Blagoev, E.J., Shohamy, D., Creso, M.J., Myers, C., & Gluck, M.A. (2001). Interactive memory systems in the human brain. *Nature* 414, 546–550.
- Rissman, J., Gazzaley, A., & D'Esposito, M. (2004). Measuring functional connectivity during distinct stages of a cognitive task. *NeuroImage*, 23, 752–763.
- Rudorf, S., & Hare, T.A. (2014). Interactions between dorsolateral and ventromedial prefrontal cortex underlie context-dependent stimulus valuation in goal-directed choice. *J Neurosci*, 34, 15988-15996.
- Schnyer, D.M., Nicholls, L., & Verfaellie, M. (2005). The role of VMPC in metamemorial judgments of content retrievability. *J Cogn Neurosci*, 17, 832-846.
- Seeger, C.A., & Miller, E.K. (2010). Category learning in the brain. *Annu Rev Neurosci*, 33, 203-219.
- Seeger, C.A., Braunlich, K., Wehe, H.S., & Liu, Z. (2015) Generalization in category learning: The roles of representational and decisional uncertainty. *J Neurosci*, 35, 8802-8812.

- Shepard, R.N., Hovland, C.I., & Jenkins, H.M. (1961). Learning and memorization of classifications. *Psychological Monographs*, 75, No. 13.
- Siegel, J.S., Power, J.D., Dubis, J.W., Vogel, A.C., Church, J.A., Schlaggar, B.L., & Petersen, S.E. (2014). Statistical improvements in functional magnetic resonance imaging analyses produced by censoring high-motion data points. *Hum Brain Mapp*, 35, 1981–1996.
- Svenson, O. (1992). Differentiation and consolidation theory of human decision making. *Acta Psychologica*, 80, 143–168.
- Tom, S. M., Fox, C. R., Trepel, C., & Poldrack, R. A. (2007). The neural basis of loss aversion in decision-making under risk. *Science*, 315, 515-518.
- White CN, Mumford JA, & Poldrack RA. (2012). Perceptual criteria in the human brain. *J Neurosci*, 32,16716–16724.
- Zeithamova, D., Maddox, W.T., (2006). Dual-task interference in perceptual category learning. *Memory and Cognition*, 34, 387–398.
